# Supplementary material for: A climate analog approach to evaluate seed transfer and vegetation transitions
Source: Frontiers journal article supplement (doi:10.3389/ffgc.2024.1325264), 2024-04-02

**Supplementary Tables**

Table S1. General circulation models (GCM) and emissions scenarios (Representative Concentration Pathways, RCPs) used to calculate the 2060 mean climate of target locations. See Van Vuuren et. al, (2011) for supporting documentation.

| GCM | Source | RCP | | |
| --- | --- | --- | --- | --- |
| 4.5 | 6.0 | 8.5 |
| CCSM4.0 | Community Earth System, National Center for Atmospheric Research | x | x | x |
| GFDLCM3 | Geophysical Fluid Dynamics Laboratory | x | x | x |
| HadGEM2ES | Met Office, UK | x | x | x |
| CESM1BGC | Community Earth System | x |  | x |
| CNRMCM5 | National Centre for Meteorological Research and Centre Européen de Recherche et de Formation Avancée en Calcul Scientifique | x |  | x |

Table S2. Climate variables used in Euclidean distance calculations with their means and standard deviations used for standardization. Temperature is °C, precipitation is mm.

| **acronym** | Climate variable | Mean | Standard deviation |
| --- | --- | --- | --- |
| DD5 | degree-days > 5 °C | 2534.977 | 1932.369 |
| MAT | mean annual temperature | 8.765426 | 8.068447 |
| D100 | Julian date sum of degree-days > 5 °C reaching 100 | 100.6127 | 64.31971 |
| MTCM | mean temperature in the coldest month | -0.7668354 | 11.04745 |
| MMAX | mean maximum temperature in the warmest month | 25.97368 | 6.988394 |
| TDIFF | Summer-winter temperature differential, mean temperature in the warm month - MTCM | 19.21939 | 7.777912 |
| MAP | mean annual precipitation | 808.233 | 550.5506 |
| GSP | growing season precipitation, April to September | 433.1587 | 333.9946 |
| SPRP | spring precipitation, April + May | 97.6812 | 69.0688 |
| SMRP | summer precipitation, July + August | 168.1963 | 147.5751 |
| WINP | winter precipitation, November to February | 251.5501 | 251.3028 |
| PRATIO | precipitation ratio, GSP/MAP | 0.5454912 | 0.1847517 |
| SMRATIO | summer precipitation ratio, SMRP/GSP | 0.377 | 0.1347 |
| ADI | annual dryness index, sqrt(DD5)/MAP | 0.0884 | 0.07672 |
| SDI | summer dryness index, sqrt(GSDD5)/GSP, where GSDD5 is growing degree days summed between the last freeze of spring and first freeze of autumn | 0.1616 | 0.2068 |
| ADIMINDD0 | ADI x (1+ degree-days < 0 °C), with negative degree days based on the minimum temperature | 86.0971 | 83.6114 |
| SDIMINDD0 | SDI x (1+ degree-days < 0 °C), with negative degree days based on the minimum temperature | 141.4633 | 131.2644 |
| MAPDD5 | (MAP*DD5)/1000 | 2137.403 | 2981.045 |
| GSPDD5 | (GSP*DD5) / 1000 | 1382.943 | 2266.772 |

Table S3. Target location information, reference and mid-century mean annual temperature and precipitation for target locations presented in study.

| Target | Country | Longitude | Latitude | Elevation (m) | MAT reference | MAT mid-century | MAP reference | MAP mid-century | Associated Figure |
| --- | --- | --- | --- | --- | --- | --- | --- | --- | --- |
| Beech Creek | USA | -84.1186 | 35.0703 | 570 | 13 | 16.5 | 1563 | 1689.2 | Figure S5F |
| Birds Of Prey | USA | -116.4155 | 43.3467 | 891 | 10.6 | 14.4 | 255 | 270.2 | Figure 5B |
| Black Creek | USA | -88.9919 | 31.0202 | 75 | 18.5 | 21.5 | 1637 | 1672.8 | Figure S5D |
| Blanca Peak | USA | -105.34 | 37.63 | 3,109 | 2.5 | 6.3 | 506 | 503.2 | Figure S7 |
| Cheran | Mexico | -101.9375 | 19.7274 | 2,828 | 13.7 | 16.5 | 1026 | 1010.5 | Figure 7A |
| Chilhowee | USA | -84.5954 | 35.0703 | 560 | 13.2 | 16.8 | 1507 | 1628.5 | Figure S5E |
| Chiricahua | USA | -109.2725 | 31.8906 | 2,725 | 8.5 | 12.1 | 759 | 757.8 | Figure S3 |
| Conner Canyon | USA | -114.6938 | 39.0297 | 2,154 | 6.8 | 10.6 | 333 | 338.7 | Figure 5C |
| Dayton | USA | -119.5951 | 39.2301 | 1,331 | 10.5 | 14 | 197 | 198.8 | Figure 5A |
| El Chocolate | Mexico | -101.6266 | 18.88 | 851 | 26.6 | 29.3 | 764 | 756 | Figure 7D |
| Francis Marion | USA | -79.7817 | 33.1164 | 30 | 18 | 20.8 | 1293 | 1373 | Figure S5G |
| Ft Nelson | Canada | -122.7283 | 58.7983 | 410 | -0.8 | 2.7 | 507 | 585.8 | Figure 4B |
| Thunder Bay | Canada | -84.5261 | 46.6154 | 215 | 4.2 | 8.1 | 936 | 993.5 | Figure S4 |
| Lewiston | USA | -117.0011 | 46.4004 | 250 | 12.5 | 15.9 | 368 | 381.4 | Figure S6A |
| Monera Alta | Mexico | -100.2903 | 19.6733 | 3,413 | 9.2 | 12.2 | 1092 | 1063.8 | Figure 7B |
| Morton | USA | -88.0658 | 41.815 | 207 | 9.3 | 13 | 918 | 973.1 | Figure S2 |
| Moscow | USA | -117.0002 | 46.7324 | 790 | 8.1 | 11.5 | 603 | 631.3 | Figure S6B |
| Moscow Mtn1000 | USA | -116.897 | 46.7895 | 1,000 | 6.9 | 10.3 | 675 | 706.2 | Figure S6C |
| Moscow Mtn1200 | USA | -116.8751 | 46.798 | 1,200 | 5.8 | 9.2 | 729 | 760 | Figure 2 |
| Moscow Mtn1500 | USA | -116.8638 | 46.804 | 1,500 | 4.2 | 7.6 | 825 | 861.1 | Figure S6E |
| Mt Ida | USA | -93.5697 | 34.5497 | 228 | 15.5 | 19 | 1375 | 1395.4 | Figure S5B |
| Muncho Lake | Canada | -125.7632 | 58.9256 | 872 | -0.9 | 2.7 | 495 | 571.5 | Figure 4A |
| Nevado De Toluca | Mexico | -99.7272 | 19.125 | 3,827 | 6 | 8.9 | 1165 | 1123.5 | Figure 7C |
| Stuart | USA | -92.4737 | 31.5037 | 70 | 18.5 | 21.8 | 1520 | 1510.7 | Figure S5C |
| Tiger Mtn | USA | -122.0345 | 47.5297 | 200 | 10 | 13.3 | 1489 | 1510.5 | Figure 3 |
| Trail Creek | USA | -114.0275 | 44.0024 | 2,037 | 3.4 | 7.1 | 294 | 300.7 | Figure 5D |
| Uinta Basin | USA | -109.972 | 40.4767 | 1,804 | 7.1 | 11.1 | 232 | 233.3 | Figure S8B |
| Uinta High | USA | -110.1996 | 40.668 | 2,826 | 1.9 | 5.8 | 529 | 537 | Figure S8E |
| Uinta Low | USA | -110.0772 | 40.535 | 2,171 | 5.4 | 9.4 | 310 | 311.8 | Figure S8C |
| Uinta Mid | USA | -110.1445 | 40.6272 | 2,357 | 4.4 | 8.4 | 367 | 367.6 | Figure S8D |
| Wutauga | USA | -81.9892 | 36.3306 | 655 | 12 | 15.6 | 1155 | 1262.3 | Figure S5A |

Table S4. Cumulative distribution of observations (presented as percentages of the total) classified for elevation differences according to 3 analog classes (Euclidean distances). Observations are from the diagnostic dataset built by surrounding the locations of Figure 1 with altitudinal clines of 500m (see text). Average elevation that separates two points are 120m, 267m, and 293m for strong, moderate, and weak thresholds, respectively.

| Analog class | Elevation differences (m) | | | | | | | | | |
| --- | --- | --- | --- | --- | --- | --- | --- | --- | --- | --- |
| 50 | 100 | 150 | 200 | 250 | 300 | 350 | 400 | 450 | 500 |
| Strong1 | 26.2 | 49.4 | 68.9 | 83.9 | 93.3 | 97.7 | 99.3 | 99.8 | 100 | 100 |
| Moderate2 | 0.2 | 2.2 | 9.1 | 22.9 | 43.5 | 68.1 | 85.5 | 94.7 | 99.2 | 100 |
| Weak3 | 0.1 | 1.5 | 7.0 | 16.5 | 32.6 | 53.2 | 75.3 | 90.8 | 97.6 | 100 |

1 Euclidean distances, 0 - 0.6

2 Euclidean distances, 0.6 - 0.72

3 Euclidean distances, 0.72 - 0.84

Table S5. Strong analog biome occurrence (% of total) of the reference period and mid-century climates at Muncho and Fort Nelson, British Columbia, Canada. Mapped analogs are shown in Figure 4.

| Biome | Muncho Lake | | Fort Nelson | |
| --- | --- | --- | --- | --- |
| Reference period1 | Mid-century2 | Reference period3 | Mid-century4 |
| Northern Tundra | 25.2 | - | - | - |
| Alpine Tundra | 1.3 | - | - | - |
| Alaskan-Yukon subartic conifer | 31.5 | - | - | - |
| Canadian Taiga | 41.9 | 99.1 | 100.0 | 23.6 |
| Plains Grassland | - | 0.9 | - | 12.7 |
| Deciduous Forest | - | - | - | 63.7 |

1 530 strong analogs

2 110 strong analogs

3 437 strong analogs

4 157 strong analogs

Table S6. Strong analog conifer and individual species plot occurrence (%) for reference period (1990) and mid-century climates (2060) at three locations (Figure 7A, B and C). Species are in descending order from relatively cool to warm habitat.

| Species | Cherán | | Monera Alta | | Nevado de Toluca | |
| --- | --- | --- | --- | --- | --- | --- |
| 1990 | 20601 | 1990 | 20602 | 1990 | 20603 |
| conifers | 81 | 70 | 100 | 87 | 100 | 100 |
| *Pinus hartwegii* | 0 | 0 | 0 | 7 | 86 | 50 |
| *Abies religiosa* | 0 | 0 | 83 | 47 | 0 | 67 |
| *Pinus montezumae* | 12 | 4 | 33 | 20 | 14 | 12 |
| *Pinus pseudostrobus* | 30 | 8 | 0 | 53 | 0 | 0 |
| *Pinus patula* | 0 | 0 | 0 | 0 | 0 | 33 |
| *Pinus ayacahuite* | 0 | 0 | 0 | 0 | 0 | 17 |
| *Pinus teocote* | 7 | 5 | 0 | 7 | 0 | 0 |
| *Pinus leiophylla* | 30 | 17 | 0 | 0 | 0 | 0 |
| *Pinus lawsonii* | 7 | 6 | 0 | 0 | 0 | 0 |
| *Pinus herrerae* | 7 | 1 | 0 | 0 | 0 | 0 |
| *Pinus douglasiiana* | 0 | 17 | 0 | 0 | 0 | 0 |
| *Pinus devoniana*  *= Pinus michoacana* | 16 | 24 | 0 | 0 | 0 | 0 |
| *Pinus oocarpa* | 3 | 24 | 0 | 0 | 0 | 0 |
| Number of analogs | 74 | 133 | 6 | 15 | 7 | 6 |

1 analogs average 725 m lower in elevation and 140 km from target location

2 analogs average 500 m lower in elevation and 175 km from target location

3 analogs average 400 m lower in elevation and 180 km from target location

Table S7. Biome percentages among the reference period and mid-century analogs to the four Mexican locations in Figure 7. The changes in percentages indicates that the vegetation at all locations would be in transition to that suited to warmer habitats: at Cherán, oak-pine woodlands are projected to transition toward a lesser presence of conifers; at Monera Alta, solid conifer forests become under increasing influence of woodlands; at Nevado de Toluca, a conifer-alpine habitat transitions into solid conifer forest; and at El Chocolate, an ecotone of thornscrub and dry deciduous forest is projected to transition completely into thornscrub.

| Location | Elevation | Reference period analogs | | Mid-century analogs | |
| --- | --- | --- | --- | --- | --- |
| number | biome | number | biome |
| Cherán | 2,828 | 104 | Woodland (52%)  Conifer forest (37%) | 266 | Woodland (68%)  Conifer forest (15%) |
| Monera Alta | 3,400 | 83 | Conifer forest (98%) | 37 | Conifer forest (54%)  Woodland (17%) |
| Nevado de Toluca | 3,827 | 52 | Alpine tundra (60%)  Conifer forest (40%) | 16 | Conifer forest (100%) |
| El Chocolate | 851 | 227 | Thornscrub (75%)  Dry Deciduous Forest (16%) | 71 | Thornscrub (100%) |

Table S8. Blanca Peak (3,109m) species plot occurrence (%) from 39 reference period (1990) and 31 mid-century (2060) strong analogs. The summary excludes minor species (< 5% for both 1990 and 2060). Analogs were from the West USA forest inventory. BLM Geospatial databases were negligible and non-forest species are not reported. Mapped analogs are found in Figure S7.

| Species | 1990 | 20601 |
| --- | --- | --- |
| *Populus tremuloides* | 53.8 | 19.4 |
| *Picea engelmanii* | 33.3 | 0 |
| *Pseudotsuga menziesii* | 51.3 | 51.6 |
| *Pinus contorta* | 10.3 | 0 |
| *Pinus aristata* | 5.1 | 0 |
| *Abies lasiocarpa* | 28.2 | 3.2 |
| *Abies concolor* | 33.3 | 35.5 |
| *Picea pungens* | 10.3 | 6.5 |
| *Pinus flexilis* | 20.5 | 6.5 |
| *Pinus ponderosa* | 12.8 | 64.5 |
| *Quercus gambelii* | 5.1 | 48.4 |
| *Pinus edulis* | 2.6 | 35.5 |
| *Juniperus monosperma* | 0 | 12.9 |
| *Juniperus scopulorum* | 2.6 | 41.9 |

1analogs average 569 m lower in elevation and 160 km from target location

Table S9. Species occurrence (%) for reference period (1990) and mid-century climates (2060) analogs at four target locations along an elevational transect (Uinta Basin = 1,804m, Uinta Low = 2,171m, Uinta Mid = 2,357m, Uinta High = 2,826m). Species are in descending order from relatively cool to warm habitat. Mapped analogs are found in Figure S8.

|  | Uinta High | | Uinta Mid | | Uinta Low | | Uinta Basin | |
| --- | --- | --- | --- | --- | --- | --- | --- | --- |
| Species | 1990 | 20601 | 1990 | 20602 | 1990 | 20603 | 1990 | 20604 |
| *Pinus contorta* | 67.8 | 0 | 8.4 | 0 | 0 | 0 | 0 | 0 |
| *Populus tremuloides* | 32.7 | 23.3 | 12.1 | 0 | 1.1 | 0 | 0 | 0 |
| *Picea engelmannii* | 26.9 | 3.3 | 1.6 | 0 | 0 | 0 | 0 | 0 |
| *Abies lasiocarpa* | 26.9 | 0 | 7.4 | 0 | 0.2 | 0 | 0 | 0 |
| *Abies concolor* | 0.6 | 20 | 0.3 | 0 | 0 | 0 | 0 | 0 |
| *Pseudotsuga menziesii* | 22.8 | 20 | 7.4 | 0 | 2 | 0 | 0 | 0 |
| *Pinus flexilis* | 6.4 | 3.3 | 1.8 | 0 | 0 | 0 | 0 | 0 |
| *Pinus ponderosa* | 2.9 | 10 | 3.9 | 0 | 0.4 | 0 | 0 | 0 |
| *Picea pungens* | 1.8 | 0 | 0.5 | 0 | 0.2 | 0 | 0 | 0 |
| *Pinus edulis* | 0.6 | 6.7 | 8.2 | 23.3 | 14.1 | 0 | 1.1 | 0.6 |
| *Juniperus scopulorum* | 2.3 | 10 | 4.2 | 0 | 2.2 | 0 | 0 | 0 |
| *Juniperus osteosperma* | 0.6 | 3.3 | 6.6 | 73.3 | 18.7 | 13.5 | 10.8 | 0.6 |
| *Pinus monophylla* | 0 | 3.3 | 0 | 20 | 0 | 5.4 | 0 | 0 |
| *Quercus gambelii* | 0 | 20 | 0.3 | 3.3 | 0.2 | 0 | 0 | 0 |
| Total strong FIA analogs | 171 | 30 | 380 | 30 | 460 | 37 | 93 | 154 |

1analogs average 636 m lower in elevation and 435 km from target location

2analogs average 376 m lower in elevation and 310 km from target location

3analogs average 504 m lower in elevation and 238 km from target location

4analogs average 443 m lower in elevation and 269 km from target location

**Supplementary Figures**

Figure S1. Mean of Euclidean climate distances plotted according to the elevation difference of the points on which distances were calculated. The number of observations in each mean varied between 48,410 and 988, was directly proportional to the elevation distance and, therefore, the standard deviation (vertical lines above and below the mean). The linear regression of mean climate distance on elevation difference had 48 degrees of freedom and a fit that was essentially perfect (R2 = 0.9999). The regression for predicting Euclidean distance from climate difference is: Y = 0.01215 + 0.002742X, where Y is Euclidean distance and X is elevation difference in meters. The regression for predicting the elevation difference equivalent to a Euclidean distance is: Y = -4.4095 + 364.67X, where Y is the elevation difference (m) and X is then Euclidean distance.


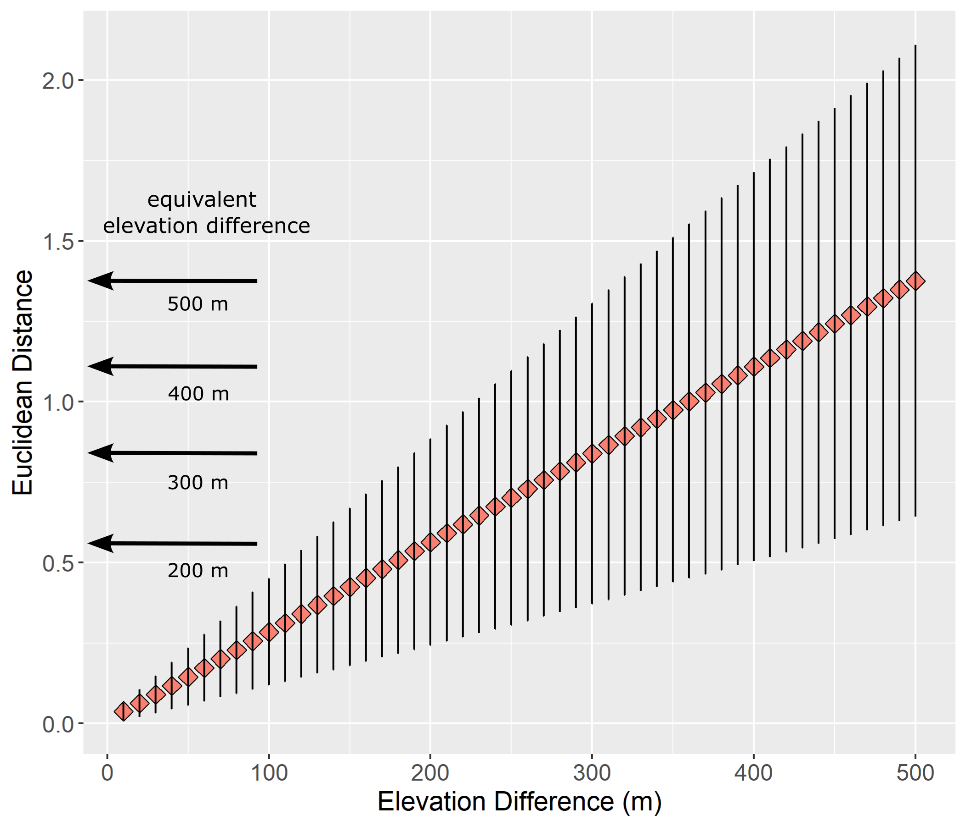


Figure S2. A) Reference climate (1961-1990) and B) mid-century (2055-2065) analogs (colored circles) for Morton Arboretum near Chicago, Illinois, USA. The yellow diamond indicates the target location with strong, moderate, and weak analogs represented as red, violet, and blue circles, respectively. Reference period analogs to the reference period climate of the site are abundant, surround the site, and tend to be distributed in a latitudinal band. Analogs to the mid-century climate are also abundant, but the strong analogs are located 300 to 800km to the southwest.


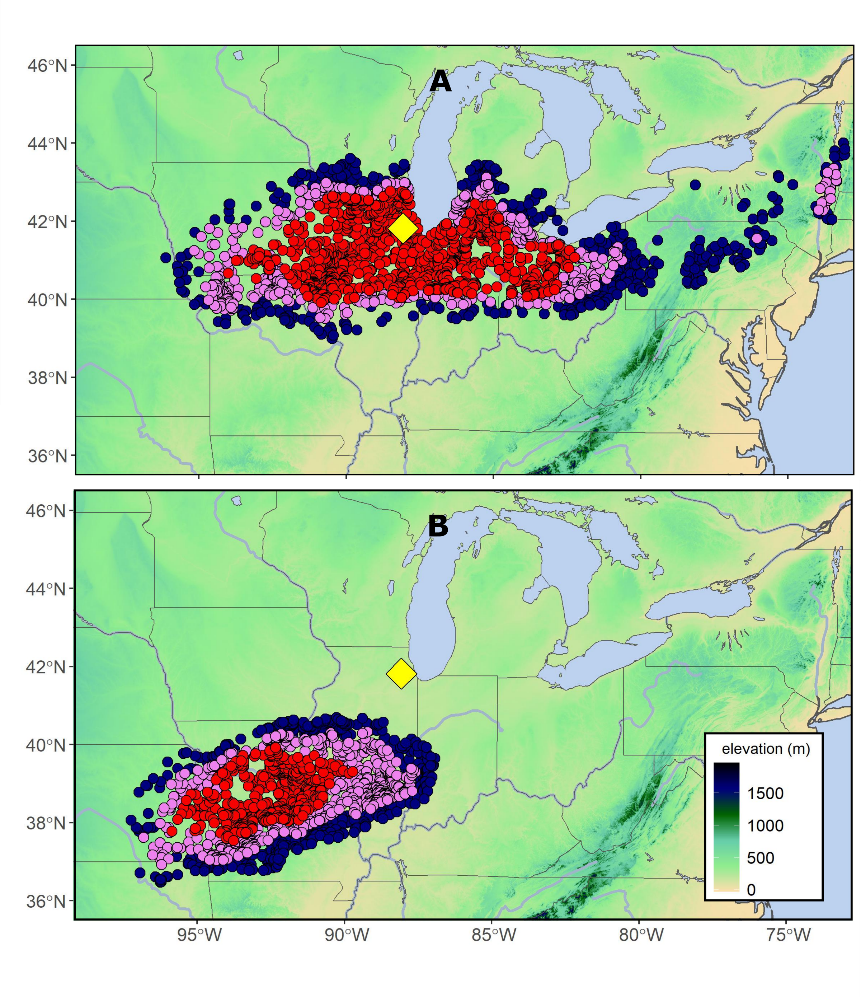


Figure S3. A target location in the upper elevations of the Chiricahua Mountains, 2,725m elevation, yielded 573 mid-century analogs from the biome, western inventory, Mexican inventory and BLM Geospatial databases, with 57 strong analogs. One-third of the total analogs and 9 of the strong analogs were in Mexico. The yellow diamond indicates the target location with strong, moderate, and weak analogs represented as red, violet, and blue circles, respectively. Mixed conifer forests dominated by *Pseudotsuga menziesii, Abies concolor, Pinus ponderosa, Pinus arizonica, Pinus strobiformis* and *Populus tremuloides* occur at this elevation in these mountains where they mix with species of the Madrean pine-oak ecosystems of Mexico. The strong analogs suggest the persistence of the mixed conifers but with a potential influx of additional species of the Madrean flora, in particular, *Pinus cembroides, Pinus ayacahuite, and Pinus durangensis.* The strong analogs in general are at elevations 400-700m lower than the target and at distances of 100-200km.


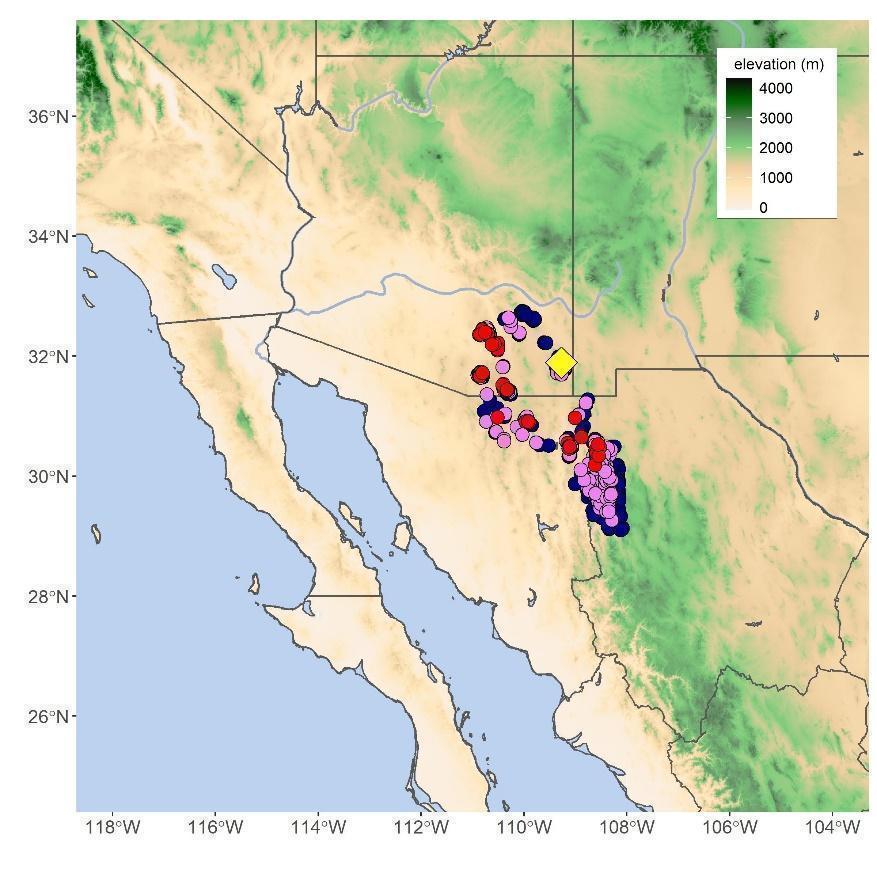


Figure S4. Thunder Bay, elevation 215 m in SE Canada. This location has 2,361 mid-century analogs found in the biome and eastern inventory databases. Strong analogs, a total of 124, are 427-1099 km to the south and east, occurring at elevations averaging 130m lower in elevation. The yellow diamond indicates the target location with strong, moderate, and weak analogs represented as red, violet, and blue circles, respectively. Both reference period vegetation of the target and analogs are temperate deciduous forests (not shown).


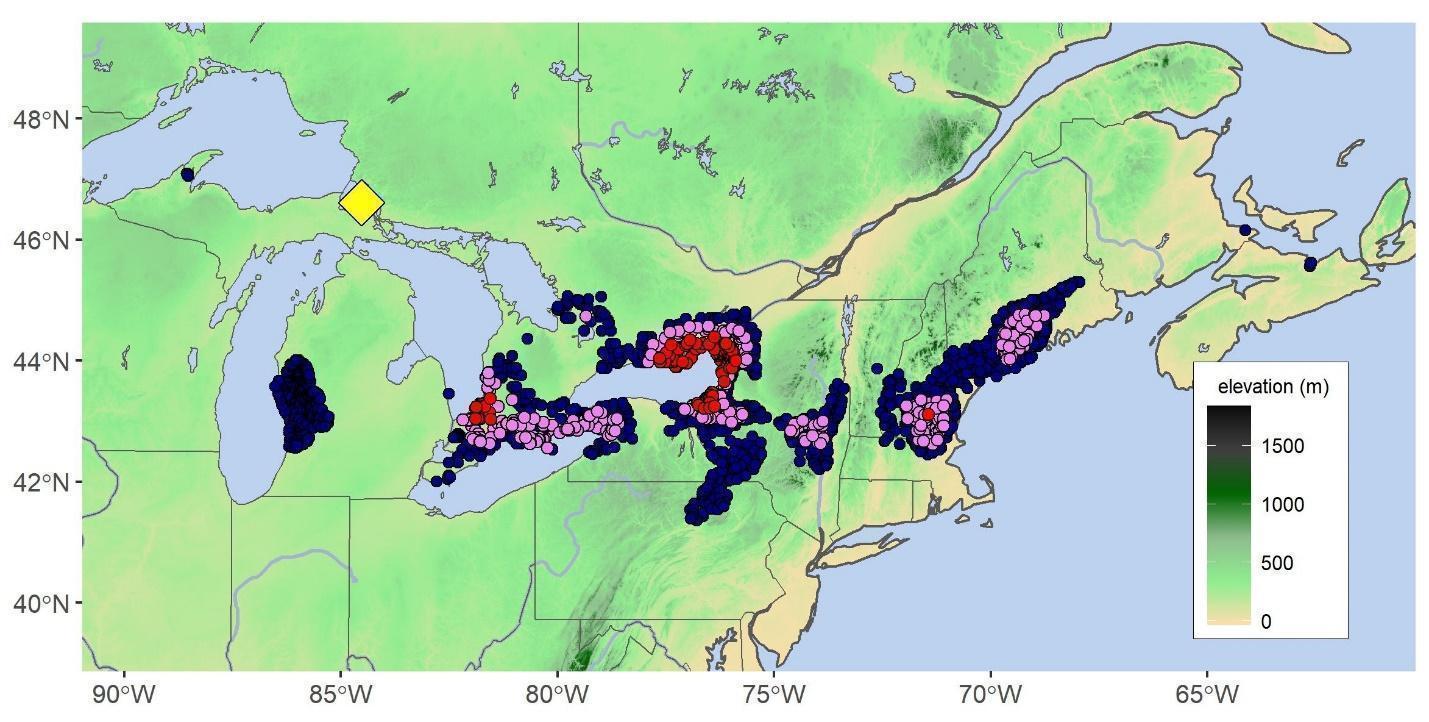


Figure S5. Seven target locations in southeast USA, illustrating with data from both the biome and eastern inventory databases: Wutauga (A) abundant, widely dispersed analogs from a mountainous site; Mt. Ida (B), Stuart (C), and Black Creek (D) sites exhibiting a lack of analogs; Chilhowee (E) and Beech Creek (F) two mountainous sites with abundant analogs 300-500km to the southeast including one strong analogs (E), while the other has only weak analogs (F); Francis Marion (G) an Atlantic coastal site with abundant analogs to the south and inland, none of which are classified as strong. The yellow diamond indicates the target location with strong, moderate, and weak analogs represented as red, violet, and blue circles, respectively. White circles show nearest neighbors, but too distant to be considered analogs.


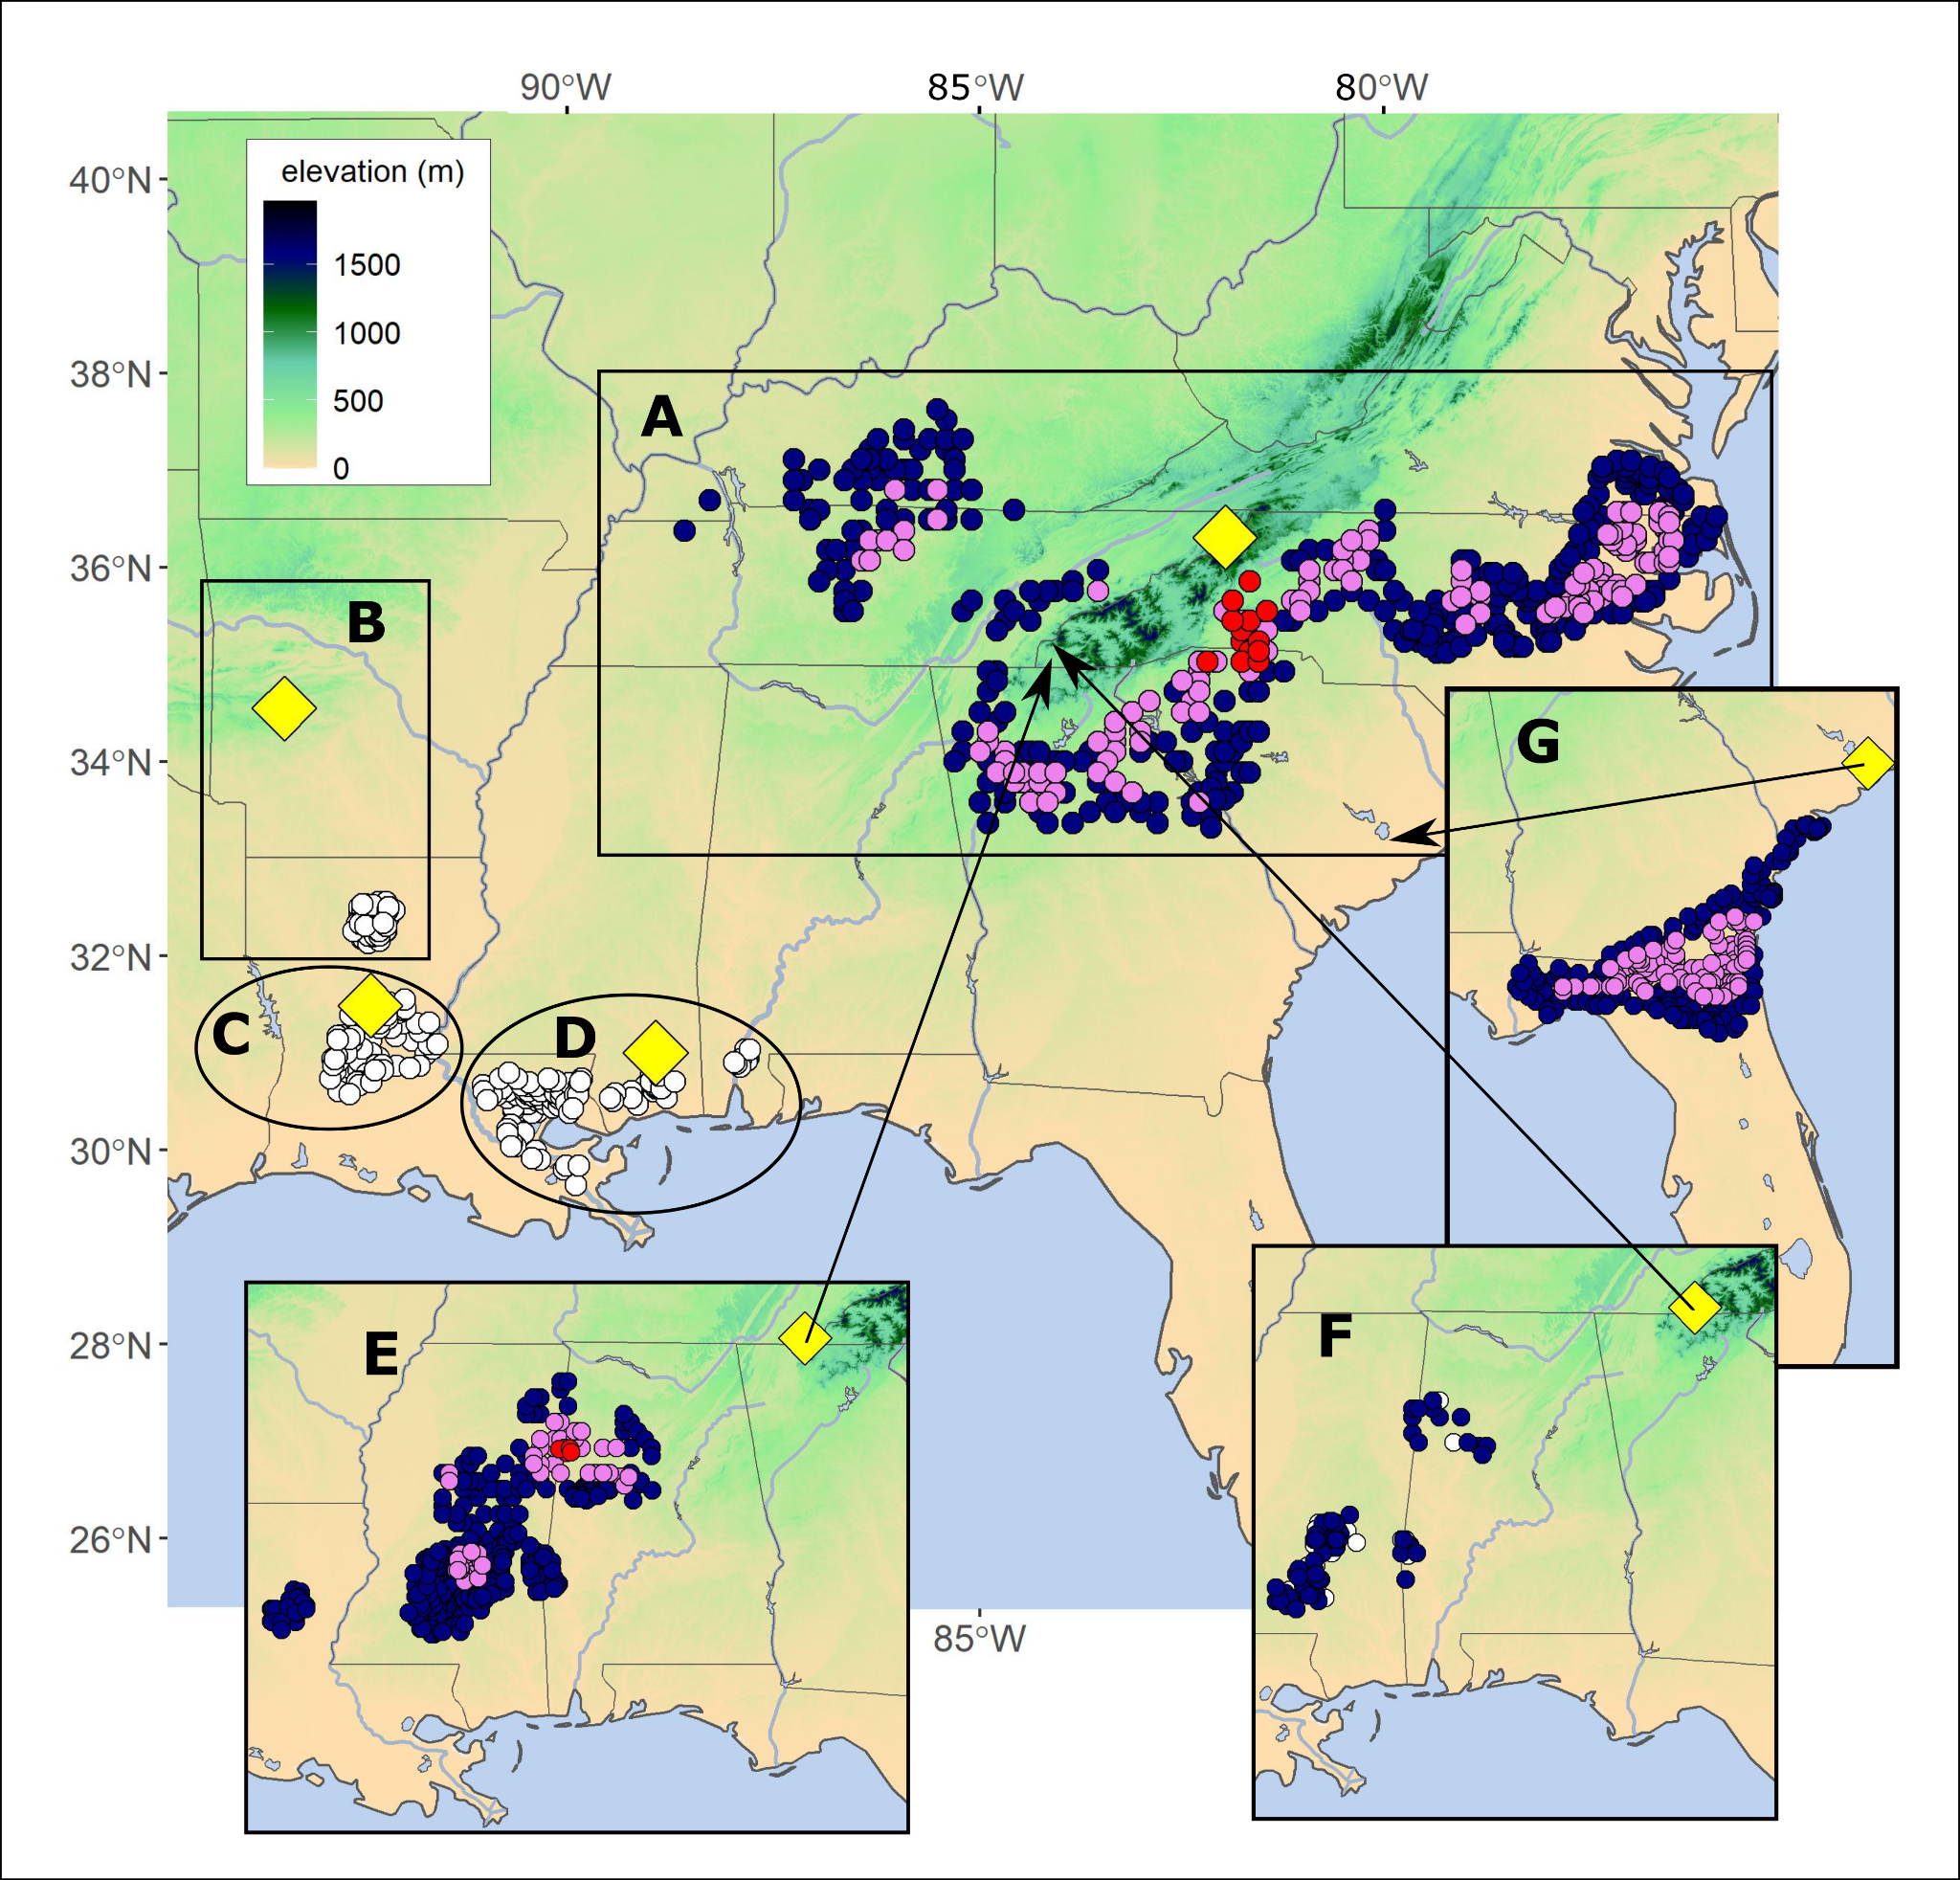


Figure S6. The five target locations are in an elevation transect from the valley floor at 250m at Lewiston, Idaho (A), Moscow, Idaho at 790m (B), and to three locations on Moscow Mountain at 1,000m (C), 1200m (D) and 1,500m (E). The transect shows an increasing number of analogs as elevation increases with none (A) or very few (B) on or near the valley floor. The yellow diamond indicates the target location with strong, moderate, and weak analogs represented as red, violet, and blue circles, respectively.


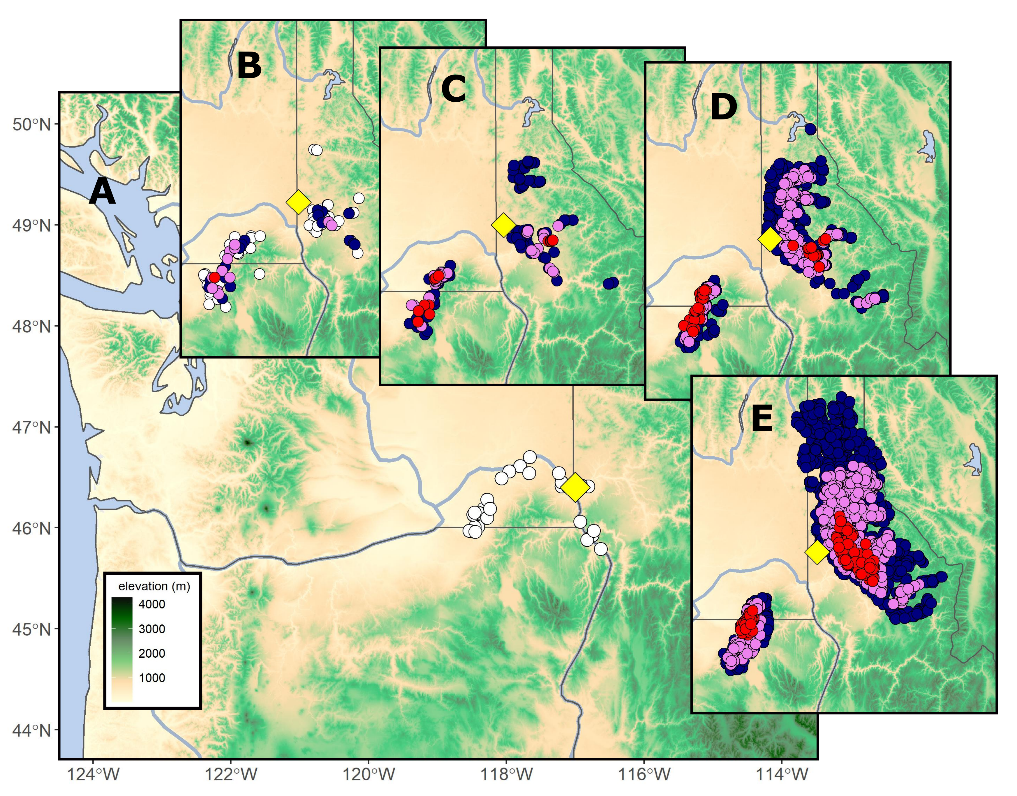


Figure S7. Blanca Peak target location in southern Colorado, 3,109m elevation, showing mid-century analogs. Mid-century vegetation shifts from reference period forest that are composed of upper montane and subalpine to lower montane species and pinyon-juniper woodlands (see Table S8). The yellow diamond indicates the target location with strong, moderate, and weak analogs represented as red, violet, and blue circles, respectively.


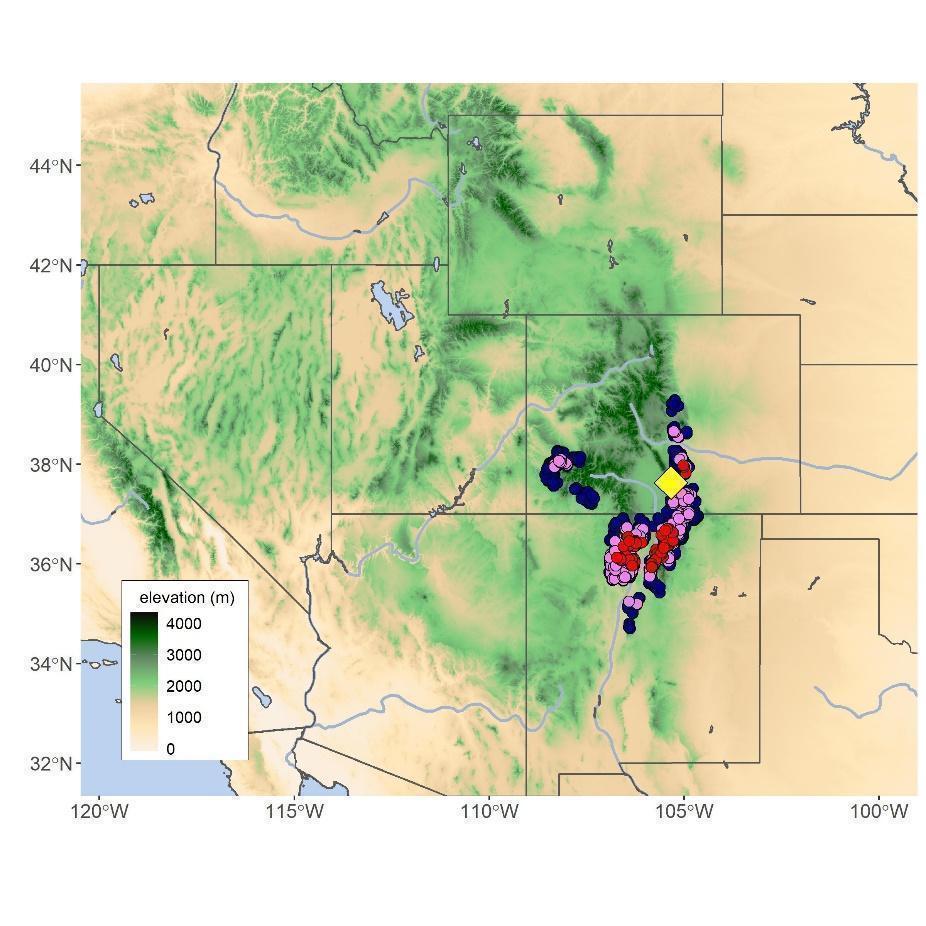


Figure S8. Uinta river target location showing the elevational transect (A). Basin (B) and Low (C) show a large array of mid-century analogs. Mid (D) and High (E) are limited to fewer moderate and weak analogs. Projected transition or decline of select species at each target are shown in Table S9. The yellow diamond indicates the target location with strong, moderate, and weak analogs represented as red, violet, and blue circles, respectively.


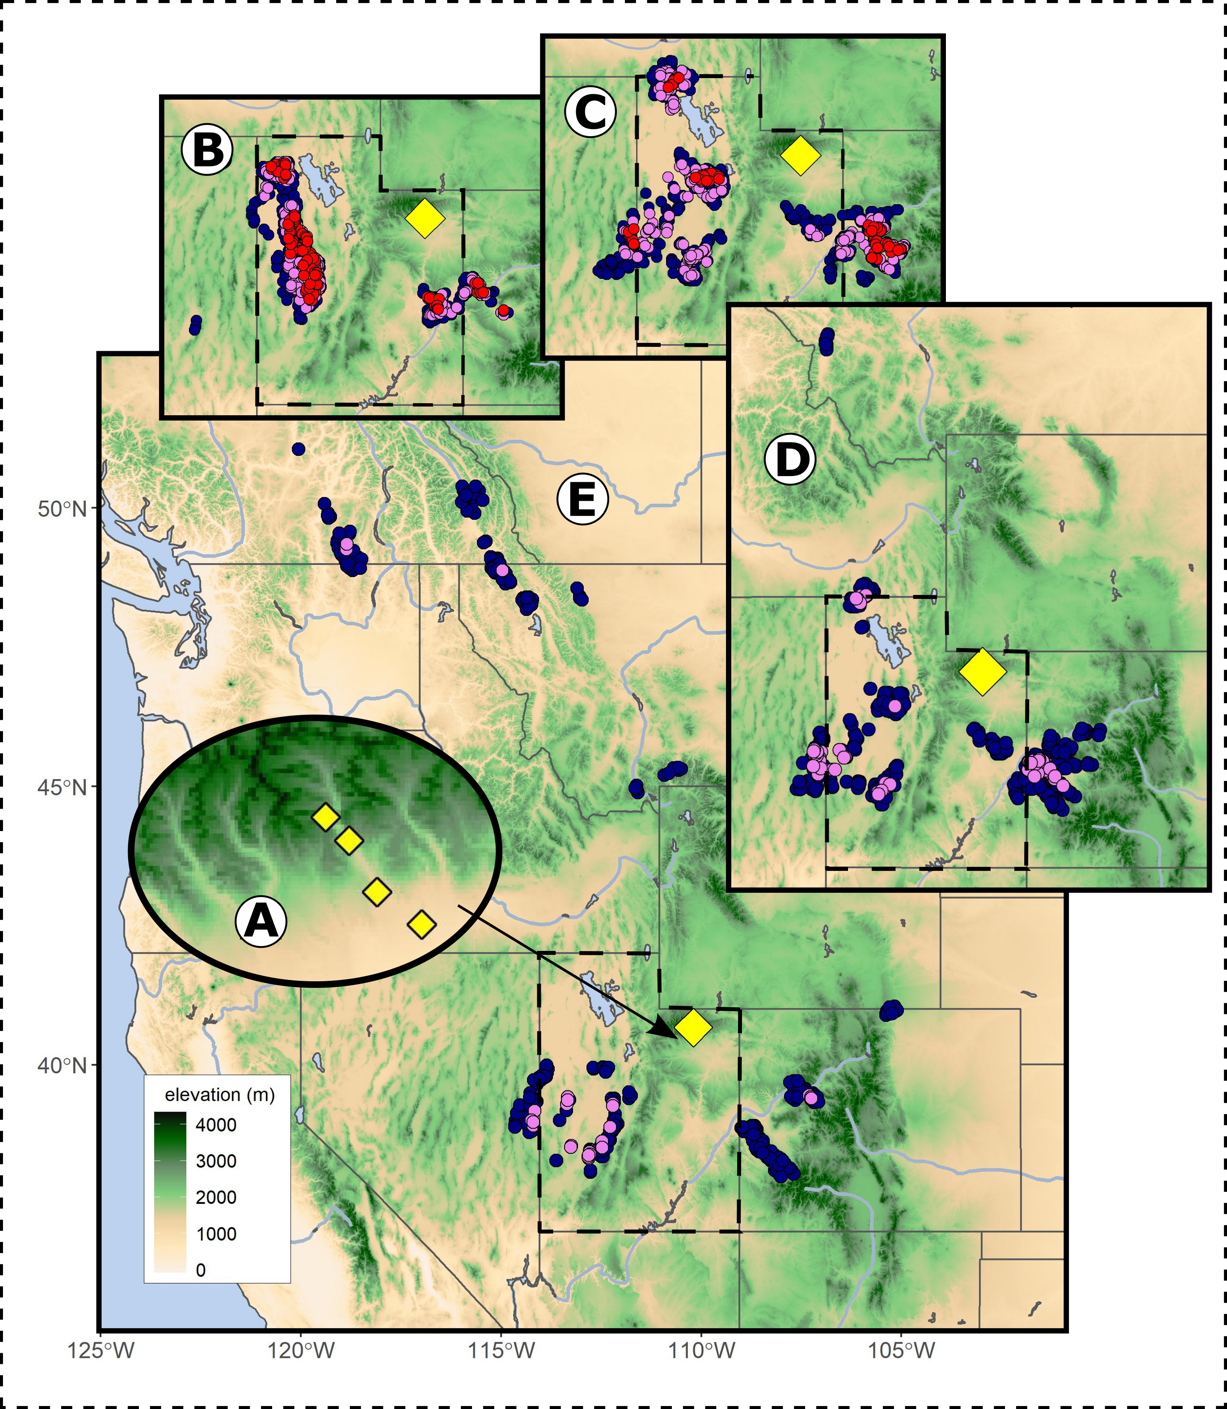

Supplement: Table_1.DOCX [file Table_1.DOCX]
